# Supplementary material for: Activation of the PI3K/Akt/mTOR and MAPK Signaling Pathways in Response to Acute Solar-Simulated Light Exposure of Human Skin
Source: Oxford University Press journal article supplement (doi:10.1158/1940-6207.capr-14-0407), 2015-06-01
Supplement: 19406207capr140407-sup-140701_1_supp_2934673_nmm5fp.docx [file 19406207capr140407-sup-140701_1_supp_2934673_nmm5fp.docx]

**Supplementary Figure 1**

Box plot graphs of protein expression in sun-protected skin after 2, 2,5, and 3 MED (x-axis) of SSL-irradiation (SSL) with baseline (green bars), 5 minutes (orange bars), 1 hour (blue bars), 5 hours (red bars), and 24 hours (grey bars) post SSL on the y-axis. (a) Phospho-Akt (Serine473) expression, (b) phospho-mTOR (Serine2448), (c) phospho-S6 (Serine235/236) expression, (d) and phospho-4E-BP1 (Threonine37/46) expression. In the box plots, the median values are represented by lines within the boxes, whiskers representthe interquartile range, and outliers are represented as individual data points.

**Supplementary Figure 2**

Box plot graphs of protein expression in sun-protected skin after 2, 2,5, and 3 MED (x-axis) of SSL-irradiation (SSL) with baseline (green bars), 5 minutes (orange bars), 1 hour (blue bars), 5 hours (red bars), and 24 hours (grey bars) post SSL on the y-axis. (a) Phospho-p38 (Threonine180/Tyrosine182), (b) phospho-ERK 1/2 (Threonine202/Tyrosine204) expression, (c) phospho-histone H3 (Serine10) expression, (d) and COX-2 expression. In the box plots, the median values are represented by lines within the boxes, whiskers representthe interquartile range, and outliers are represented as individual data points.

**Supplementary Figure 3**

Box plot graphs of protein expression in sun-protected skin after 2, 2,5, and 3 MED (x-axis) of SSL-irradiation (SSL) with baseline (green bars), 5 minutes (orange bars), 1 hour (blue bars), 5 hours (red bars), and 24 hours (grey bars) post SSL on the y-axis. (a) p53, (b) cleaved caspase 3, (c) and morphologic apoptosis on H&E. In the box plots, the median values are represented by lines within the boxes, whiskers representthe interquartile range, and outliers are represented as individual data points.
